# Supplementary material for: Nano-Infrared Imaging of Primary Neurons
Source: MDPI journal article supplement (doi:10.3390/cells10102559), 2021-09-27
Supplement: s1 [file s1]

# Supplementary Information

## Nano-infrared imaging of primary neurons

Raul O. Freitas <sup>1,\*</sup>, Adrian Cernescu <sup>2</sup>, Anders Engdahl <sup>3</sup>, Agnes Paulus <sup>3,4</sup>, João E. Levandoski <sup>1</sup>, Isak Martinsson <sup>5</sup>, Elke Hebisch <sup>6</sup>, Christophe Sandt <sup>7</sup>, Gunnar Keppler Gouras <sup>5</sup>, Christelle N. Prinz <sup>6</sup>, Tomas Deierborg <sup>4</sup>, Ferenc Borondics <sup>7</sup>, Oxana Klementieva <sup>3,\*</sup>

<sup>1</sup> Brazilian Synchrotron Light Laboratory (LNLS), Brazilian Center for Research in Energy and Materials (CNPEM), 13083-970 Campinas, Sao Paulo, Brazil; joao.levandoski@lnls.br (J.E.L.); raul.freitas@lnls.br (R.O.F.)

<sup>2</sup> Attocube Systems AG, Eglfinger Weg 2, 85540 Munich, Germany; Adrian.Cernescu@neaspec.com

<sup>3</sup> Medical Microspectroscopy, Department of Experimental Medical Science, Lund University, 22180 Lund, Sweden; anders.engdahl@med.lu.se (A.E.); agnes.paulus@med.lu.se (A.P.), oxana.klementieva@med.lu.se (O.K.)

<sup>4</sup> Experimental Neuroinflammation Laboratory, Department of Experimental Medical Science, Lund University, 22180 Lund, Sweden; tomas.deierborg@med.lu.se

<sup>5</sup> Experimental Dementia Research, Department of Experimental Medical Science, Lund University, 22180 Lund, Sweden; isak.martinsson@med.lu.se (I.M.); gunnar.gouras@med.lu.se (G.K.G.)

<sup>6</sup> Division of Solid State Physics and NanoLund, Lund University, Lund 22100, Sweden; elke.hebisch@ftf.lth.se (E.H.); christelle.prinz@ftf.lth.se (C.N.P.)

<sup>7</sup> Synchrotron SOLEIL, L'Orme des Merisiers, CEDEX, 91192 Gif Sur Yvette, France; christophe.sandt@synchrotron-soleil.fr (C.S.); ferenc.borondics@synchrotron-soleil.fr (F.B.)

\* Correspondence: raul.freitas@lnls.br (R.O.F.); oxana.klementieva@med.lu.se (O.K.)

**Keywords:** O-PTIR; s-SNOM; neuron; Amyloid-beta; Alzheimer's disease

---

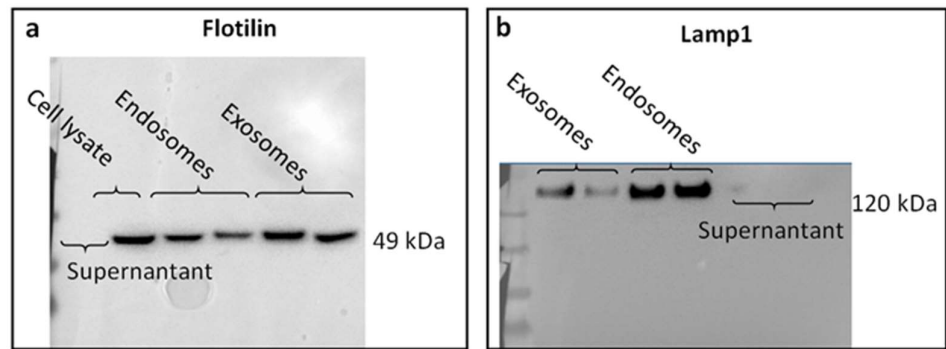

**Figure S1.** Characterization of exosomal preparation. Representative Western blots of cell lysate, supernatant, and fractions containing exosomes and endosomes are shown. (a) Representative Western blot with flotillin, a marker of exosomes. (b) Representative Western blot with Lamp1, a marker of endosomes.

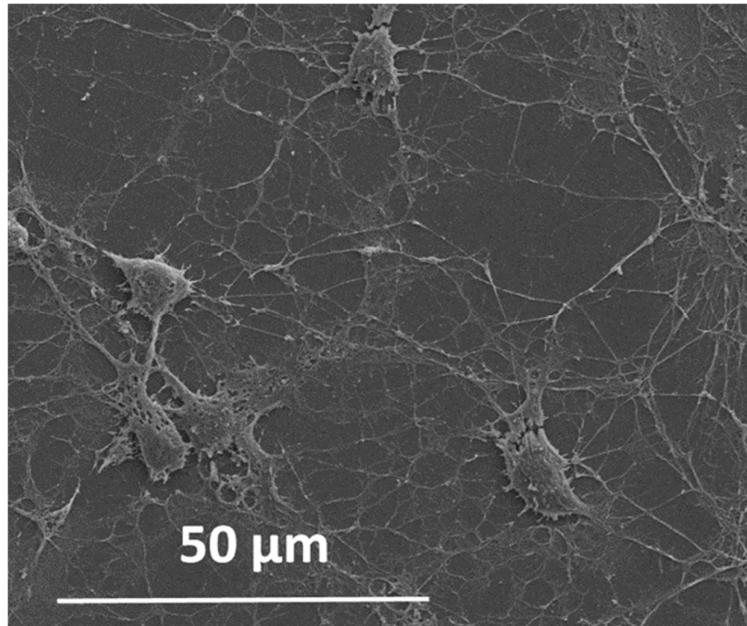

**Figure S2.** Sample characterization. Primary neurons were seeded on 100 nm gold-coated chips. After 19 days of growth and maturation, neurons were fixed with 4% paraformaldehyde in phosphate buffer saline for 15 min at room temperature, washed, and air-dried. Examining the neurons using surface scanning electron microscopy confirmed that air-drying did not affect the quality of the sample.

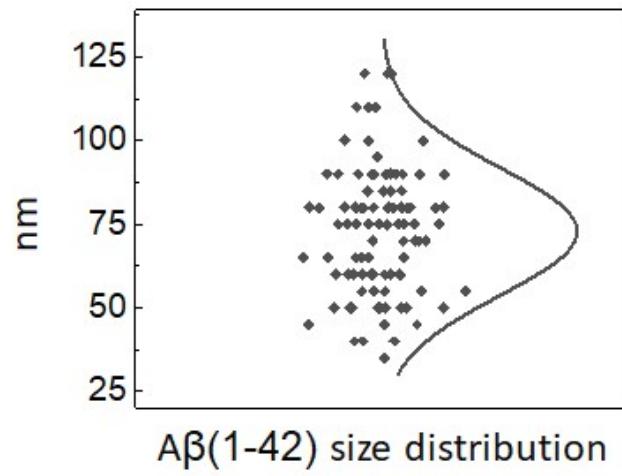

**Figure S3.** Aβ-size distribution. To calibrate STED micro-scope we used 20 nm fluorescent beads,  $\varnothing$  = 25 nm. The plot represents size distribution of Aβ(1-42) particles measured by S TED.

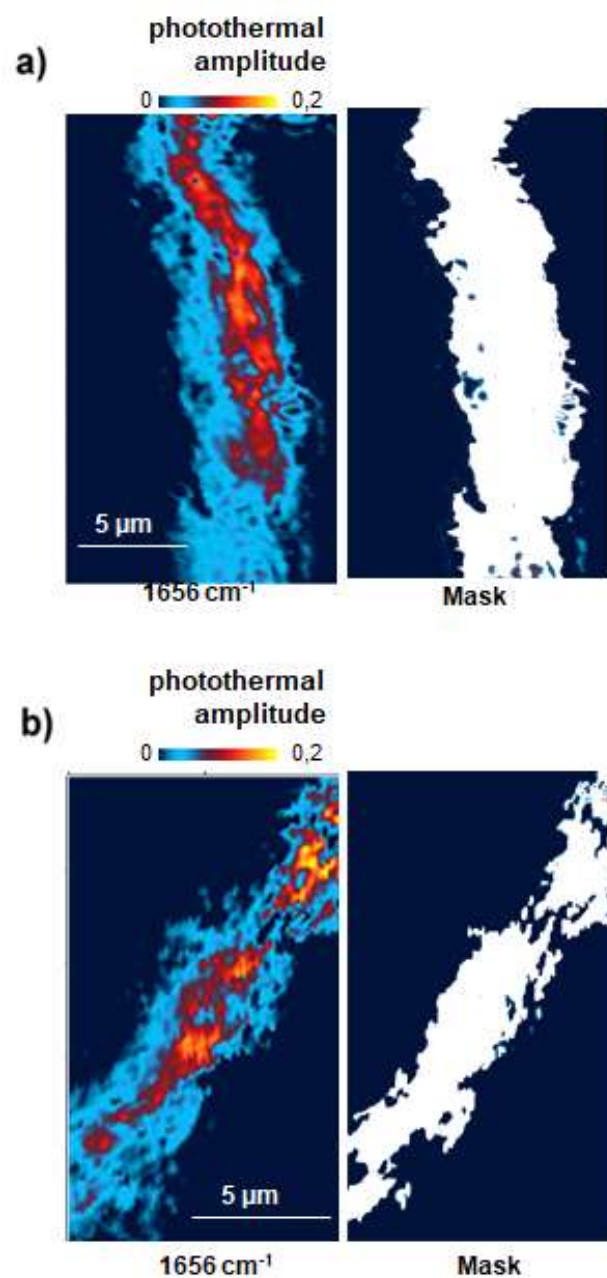

**Figure S4.** Mask rendering. O-PTIR maps were acquired from wild-type (a) and AD transgenic neurons (b). Blue-yellow gradient indicates elevations of the intensities at 1650  $\text{cm}^{-1}$ . Right panels: masks which were rendered using threshold set to 0.03 a.u. of photothermal amplitude of 1650  $\text{cm}^{-1}$  map.

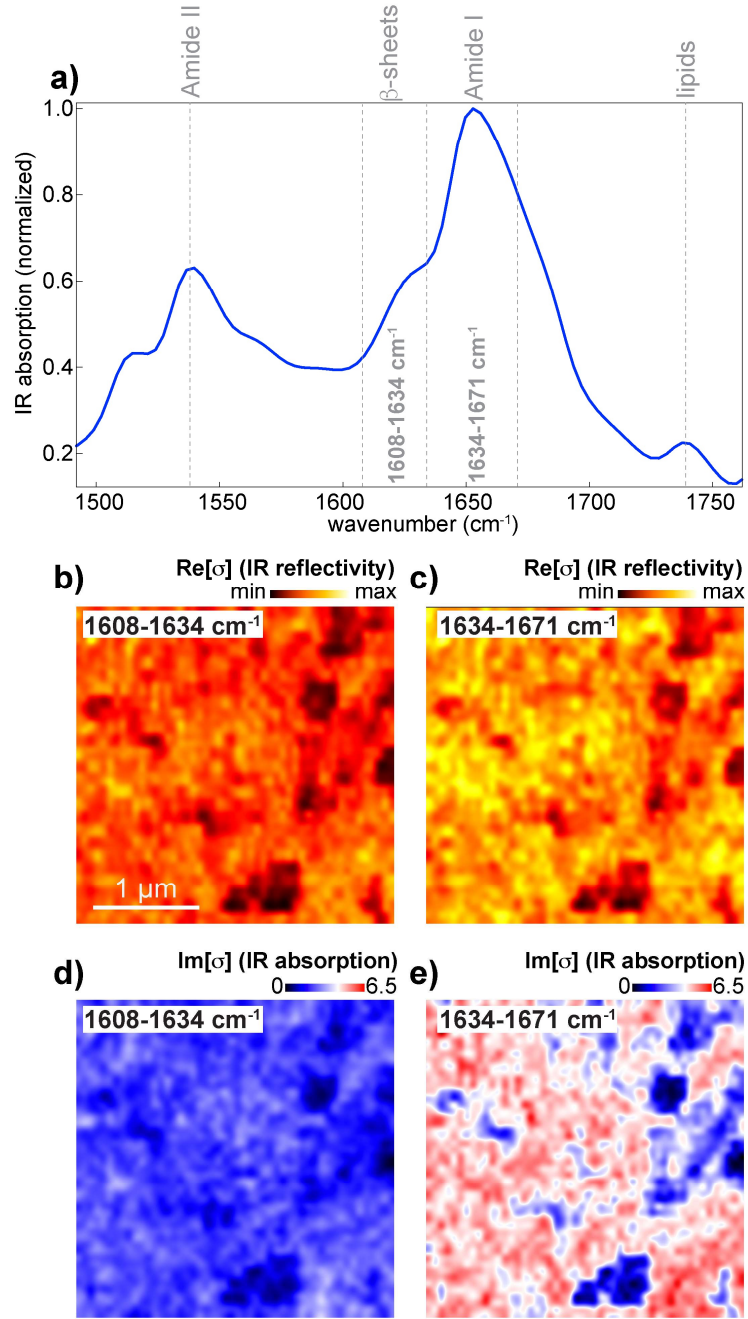

**Figure S5.** Example of s-SNOM hyperspectral nanoimaging. (a) Point spectrum from an arbitrary pixel of the HS map indicating the spectral ranges 1608–1634 cm<sup>-1</sup> and 1634–1671 cm<sup>-1</sup> used for nanoimaging analysis. (b–c) Nanoscale IR reflectivity integrated across the spectral ranges 1608–1634 cm<sup>-1</sup> and 1634–1671 cm<sup>-1</sup>, respectively, reconstructed from a 3 × 3 μm<sup>2</sup> HS map of wild-type neurons. (d–e) Nanoscale IR absorption images integrated within the spectral ranges 1608–1634 cm<sup>-1</sup> and 1634–1671 cm<sup>-1</sup>, respectively.
